# Supplementary material for: Gastric Cancer in the Era of Immune Checkpoint Blockade
Source: Hindawi journal article supplement (doi:10.1155/2019/1079710), 2019-09-24
Supplement: f1 [file 1079710.f1.pdf]

## Supplementary Table.

Supplementary Table I. Summary of the most representative clinical trials for immune checkpoint blockade therapy in gastric cancer.

| Study* / Regimen                                                          | Study population                                                                                | Biomarker                                             | Main results**                                                                                                                                                                                                                               | Reference |
|---------------------------------------------------------------------------|-------------------------------------------------------------------------------------------------|-------------------------------------------------------|----------------------------------------------------------------------------------------------------------------------------------------------------------------------------------------------------------------------------------------------|-----------|
| <b>KEYNOTE-012</b><br><b>Phase Ib</b><br><b>Cohort D</b><br>Pembrolizumab | 36 patients with advanced PD-L1+ GC                                                             | PD-L1 (staining in $\geq 1\%$ tumor and immune cells) | ORR= 22% (CI 10-39), all PR<br>Patients with tumor size reduction = 53%<br>PFS = 1.9 months (CI 1.8-3.5)<br>OS = 11.4 months (CI 5.7-not reached)                                                                                            | [1]       |
|                                                                           | 33 GC patients: 61% with high Youden index-based cutoff value for the IFN- $\gamma$ -driven GEP | IFN- $\gamma$ -driven GEP                             | IFN- $\gamma$ -driven GEP associated with a better OR (p<0.10) and PFS (p<0.05).<br>Youden index-based cutoff value for the IFN- $\gamma$ -driven GEP was necessary, but not always sufficient, for clinical benefit (PPV = 45%, NPV = 92%). | [2]       |
| <b>KEYNOTE-059</b><br><b>Phase II</b><br><b>Cohort 1</b><br>Pembrolizumab | 259 patients with previously treated advanced GC: 57% PD-L1+                                    | Total cases                                           | ORR in general = 12% (CI 8-16),<br>CR = 2% (CI 1-5)<br>PFS in general = 2.0 months (CI 2.0-2.1)<br>OS in general = 5.6 months (CI 4.3 – 4.3-6.9)                                                                                             | [3]       |
|                                                                           |                                                                                                 | PD-L1 (CPS $\geq 1$ )                                 | ORR in PD-L1+ patients = 16% (CI 10-22)<br>ORR in PD-L1- patients = 6% (CI 3-13)<br>PFS in PD-L1+ patients = 2.1 months (CI 2.0-2.1)<br>PFS in PD-L1- patients = 2.0 (CI 1.9-2.0)                                                            |           |
|                                                                           |                                                                                                 | MSI                                                   | ORR in MSI-high patients = 57% (CI 18-90)<br>ORR in non-MSI-high patients = 9% (CI 5-14)                                                                                                                                                     |           |
|                                                                           | 144 patients with previously treated advanced GC                                                | T-cell-inflamed-GEP                                   | A higher GEP score was associated with improved propensity for response and PFS (p=0.010 and p=0.002, respectively).                                                                                                                         |           |

| Study* / Regimen                                                        | Study population                                                    | Biomarker              | Main results**                                                                                                                                                                                                                                                                                | Reference |
|-------------------------------------------------------------------------|---------------------------------------------------------------------|------------------------|-----------------------------------------------------------------------------------------------------------------------------------------------------------------------------------------------------------------------------------------------------------------------------------------------|-----------|
|                                                                         |                                                                     |                        | All PD-L1 CPS $\geq 20$ had T-cell-inflamed GEP scores in the upper half of the range, but PD-L1 CPS $< 20$ cases were associated with a broad range of T-cell-inflamed GEP scores.                                                                                                           |           |
| <b>KEYNOTE-059 Phase II Cohort 2</b><br>Pembrolizumab +<br>Chemotherapy | 25 patients with untreated advanced GC: 64% PD-L1+                  | Total cases            | ORR in general = 60% (CI 39-79), CR = 4% (one patient)<br>PFS in general = 6.6 months (CI 5.9-10.6)<br>OS in general = 13.8 months (CI 8.6-not estimable)                                                                                                                                     | [4]       |
|                                                                         |                                                                     | PD-L1 (CPS $\geq 1$ )  | ORR in PD-L1+ patients = 69% (CI 41-89)<br>ORR in PD-L1- patients = 38% (CI 8-76)<br>OS in PD-L1+ patients = 11.1 months (CI 5.4-22.3)<br>OS in PD-L1- patients = 19.8 (CI 1.8-not estimable)                                                                                                 |           |
| <b>KEYNOTE-059 Phase II Cohort 3</b><br>Pembrolizumab                   | 31 patients with untreated advanced PD-L1+ GC                       | PD-L1 (CPS $\geq 1$ )  | ORR = 26% (CI 12-45), CR = 6% (two patients)<br>PFS = 3.3 months (CI 2.0-6.0)<br>OS = 20.7 months (CI 9.2-20.7)                                                                                                                                                                               |           |
| <b>KEYNOTE-061 Phase III</b><br>Pembrolizumab vs.<br>Chemotherapy       | 395 patients with previously treated PD-L1 CPS $\geq 1$ advanced GC | PD-L1 (CPS $\geq 1$ )  | ORR (Pembrolizumab) = 16% (CI 11-22), CR = 4%<br>ORR (Chemotherapy) = 14% (CI 9-12), CR = 3%<br>PFS (Pembrolizumab) = 1.5 months (CI 1.4-2.0)<br>PFS (Chemotherapy) = 4.1 months (CI 3.1-4.2)<br>OS (Pembrolizumab) = 9.1 months (CI 6.2-10.7)<br>OS (Chemotherapy) = 8.3 months (CI 7.6-9.0) | [5]       |
|                                                                         | 592 patients with previously treated advanced GC                    | PD-L1 (CPS $\geq 10$ ) | Pembrolizumab OS was longer than chemotherapy OS for patients with a PD-L1 CPS $\geq 10$ (HR 0.64, CI 0.41-1.02).                                                                                                                                                                             |           |
|                                                                         |                                                                     | MSI                    | Pembrolizumab OS was greater                                                                                                                                                                                                                                                                  |           |

| <b>Study* / Regimen</b>                                       | <b>Study population</b>                                                                   | <b>Biomarker</b>                                                                | <b>Main results**</b>                                                                                                                                                                                                                                                                                                                                                                                                                   | <b>Reference</b> |
|---------------------------------------------------------------|-------------------------------------------------------------------------------------------|---------------------------------------------------------------------------------|-----------------------------------------------------------------------------------------------------------------------------------------------------------------------------------------------------------------------------------------------------------------------------------------------------------------------------------------------------------------------------------------------------------------------------------------|------------------|
|                                                               |                                                                                           |                                                                                 | than chemotherapy OS for patients with a MSI-high (HR 0.42, CI 0.13-1.31).                                                                                                                                                                                                                                                                                                                                                              |                  |
| <b>CheckMate 032</b><br><b>Phases I &amp; II</b><br>Nivolumab | 59 advanced or metastatic esophageal and GC patients:<br>27% PD-L1+<br>12% MSI-high       | Total cases<br>PD-L1 (CPS ≥1)<br>MSI                                            | ORR in general = 12% (CI 5-23), CR = 2% (one patient)<br>ORR in PD-L1+ patients = 19% (CI 4-46)<br>ORR in PD-L1- patients = 12% (CI 2-30)<br>ORR in MSI-high patients = 29% (CI 4-71)<br>ORR in non-MSI-high patients = 11% (CI 1-35)                                                                                                                                                                                                   | [6]              |
| <b>NCT02589496</b><br><b>Phase II</b><br>Pembrolizumab        | 61 previously treated metastatic GC patients:<br>12% MSI-high<br>10% EBV+<br>10% EMT GEP+ | Total cases<br>MSI<br>EBV<br>Immune GEP<br>Proliferation-related GEP<br>EMT GEP | ORR in general = 25% (CI = 21-46), CR = 5% (CI 1-14)<br>ORR in patients with MSI-high = 86%, CR = 43%<br>Clinical response was associated with MSI-associated GEP (p<0.0001).<br>ORR in patients EBV + = 100%, all PR<br>Clinical response was associated with immune GEP (p=0.007).<br>Clinical response was associated with proliferation-related GEP (p=0.030).<br>ORR in patients EMT GEP + = 0%<br>ORR in patients EMT GEP - = 31% | [7]              |
|                                                               | 23 previously treated metastatic GC patients                                              | ctDNA sequencing                                                                | ctDNA mutational load scores correlated with tumor tissue mutational load scores.<br>ORR in upper tertile of ctDNA mutational load = 83%<br>ORR in two lower tertile of ctDNA mutational load = 8%<br>Change in ctDNA post-treatment predicts response: all patients (n=4) with increasing ctDNA                                                                                                                                        |                  |

| <b>Study* / Regimen</b>                                           | <b>Study population</b>                                     | <b>Biomarker</b>                             | <b>Main results**</b>                                                                                                                                                                                                                                                                                                                                                                                                        | <b>Reference</b> |
|-------------------------------------------------------------------|-------------------------------------------------------------|----------------------------------------------|------------------------------------------------------------------------------------------------------------------------------------------------------------------------------------------------------------------------------------------------------------------------------------------------------------------------------------------------------------------------------------------------------------------------------|------------------|
|                                                                   |                                                             |                                              | experienced disease progression within 100 days, all patients with decreasing ctDNA demonstrated significant improvement.                                                                                                                                                                                                                                                                                                    |                  |
|                                                                   | 55 previously treated metastatic GC patients:<br>51% PD-L1+ | PD-L1<br>(CPS $\geq$ 1)                      | ORR in PD-L1+ patients = 50% (CI)<br>ORR in PD-L1- patients = 0% (CI)                                                                                                                                                                                                                                                                                                                                                        |                  |
| <b>JAVELIN Gastric 300 Phase III</b><br>Avelumab vs. Chemotherapy | 85 previously treated PD-L1+ advanced GC patients           | PD-L1                                        | PFS (Avelumab) = 1.4 months<br>PFS (Chemotherapy) = 2.8 months<br>OS (Avelumab) = 4.0 months<br>OS (Chemotherapy) = 4.5 months                                                                                                                                                                                                                                                                                               | [8]              |
| <b>JAVELIN Solid tumor JPN trial Phase I</b><br>Avelumab          | 40 previously treated advanced GC patients:<br>28% PD-L1+   | PD-L1<br>(staining in $\geq$ 1% tumor cells) | ORR in PD-L1+ patients = 27% (CI 6-61)<br>ORR in PD-L1- patients = 4% (CI 0.1-19)<br>PFS in PD-L1+ patients = 1.4 months (CI 0.7-4.0)<br>PFS in PD-L1- patients = 2.6 (CI 1.4-2.8)<br>OS in PD-L1+ patients = 10.9 months (CI 1.0-not estimable)<br>OS in PD-L1- patients = 9.1 (CI 4.9-11.0)                                                                                                                                | [9]              |
| <b>ATTRACTIO N-2 (ONO-4538-12) Phase III</b><br>Nivolumab         | 192 previously treated advanced GC patients:<br>14% PD-L1+  | PD-L1<br>(staining in $\geq$ 1% tumor cells) | OS in PD-L1+ patients (Nivolumab) = 5.2 months (CI 2.8-9.4)<br>OS in PD-L1+ patients (Placebo) = 3.8 months (CI 0.8-5.0)<br>OS in PD-L1- patients (Nivolumab) = 6.0 months (CI 4.8-8.5)<br>OS in PD-L1- patients (Placebo) = 4.2 months (CI 3.0-6.9)<br>Exploratory analyses according to PD-L1 positivity in these patients suggest an OS benefit regardless of PD-L1 expression status, with HRs for OS favoring Nivolumab | [10]             |

| Study* / Regimen | Study population | Biomarker | Main results**                                        | Reference |
|------------------|------------------|-----------|-------------------------------------------------------|-----------|
|                  |                  |           | over Placebo across PD-L1+ and PD-L1+ patient groups. |           |

CI: 95% confidence interval; CPS: combined positive score; CR: complete response; EBV: Epstein-Barr virus; ; EMT: epithelial-to-mesenchymal transition; GC: gastric cancer (some references include gastro-esophageal junction cancer in this category); GEP: gene expression profile; HR: hazard ratio; IFN- $\gamma$ : interferon gamma; MSI: microsatellite instability; MSS: microsatellite stable; NPV: negative predictive value; OR: objective response; ORR: objective response rate; OS: overall survival; PD-L1: programmed death-ligand 1; PFS: progression-free survival; PPV: positive predictive value; PR: partial response.

\*Only clinical trials that had a companion test were included.

\*\*Central reviewer's criteria reported when available.

### Supplementary References

[1] K. Muro, H. C. Chung, V. Shankaran et al., "Pembrolizumab for patients with PD-L1-positive advanced gastric cancer (KEYNOTE-012): a multicentre, open-label, phase 1b trial," *The Lancet Oncology*, vol. 17, no. 6, pp. 717–726, 2016.

[2] M. Ayers, J. Lunceford, M. Nebozhyn et al., "IFN- $\gamma$ -related mRNA profile predicts clinical response to PD-1 blockade," *Journal of Clinical Investigation*, vol. 127, no. 8, pp. 2930–2940, 2017.

[3] C. S. Fuchs, T. Doi, R. W. Jang et al., "Safety and efficacy of Pembrolizumab monotherapy in patients with previously treated advanced gastric and gastroesophageal junction cancer: phase 2 clinical KEYNOTE-059 trial," *JAMA Oncology*, vol. 4, no. 5, Article ID e180013, 2018.

[4] Y. J. Bang, Y. K. Kang, D. V. Catenacci et al., "Pembrolizumab alone or in combination with chemotherapy as first-line therapy for patients with advanced gastric or gastroesophageal junction adenocarcinoma: results from the phase ii nonrandomized keynote-059 study," *Gastric Cancer*, vol. 22, no. 4, pp. 828–837, 2019.

[5] K. Shitara, M. Ozguroglu, Y. J. Bang et al., "Pembrolizumab versus paclitaxel for previously treated, advanced gastric or gastro-oesophageal junction cancer (KEYNOTE-061): a randomised, open-label, controlled, phase 3 trial," *The Lancet*, vol. 392, no. 10142, pp. 123–133, 2018.

[6] Y. Y. Janjigian, J. Bendell, E. Calvo et al., "CheckMate-032 study: efficacy and safety of nivolumab and nivolumab plus ipilimumab in patients with metastatic esophagogastric cancer," *Journal of Clinical Oncology*, vol. 36, no. 28, pp. 2836–2844, 2018.

- [7] S. T. Kim, R. Cristescu, A. J. Bass et al., “Comprehensive molecular characterization of clinical responses to PD-1 inhibition in metastatic gastric cancer,” *Nature Medicine*, vol. 24, no. 9, pp. 1449–1458, 2018.
- [8] Y.-J. Bang, E. Y. Ruiz, E. Van Cutsem et al., “Phase III, randomised trial of avelumab versus physician’s choice of chemotherapy as third-line treatment of patients with advanced gastric or gastro-oesophageal junction cancer: primary analysis of JAVELIN gastric 300,” *Annals of Oncology*, vol. 29, no. 10, pp. 2052–2060, 2018.
- [9] T. Doi, S. Iwasa, K. Muro et al., “Phase 1 trial of avelumab (anti-PD-1) in Japanese patients with advanced solid tumors, including dose expansion in patients with gastric or gastroesophageal junction cancer: the Javelin solid tumor JPN trial,” *Gastric Cancer*, vol. 22, no. 4, pp. 817–827, 2019.
- [10] Y.-K. Kang, N. Boku, T. Satoh et al., “Nivolumab in patients with advanced gastric or gastro-oesophageal junction cancer refractory to, or intolerant of, at least two previous chemotherapy regimens (ONO-4538-12, ATTRACTION-2): a randomised, double-blind, placebo-controlled, phase 3 trial,” *The Lancet*, vol. 390, no. 10111, pp. 2461–2471, 2017.
